# Supplementary material for: Small polyanion recognition of a triazolium cyclodextrin click cluster in water
Source: Royal Society of Chemistry journal article supplement (doi:10.1039/c5ob00999e), 2015-01-01
Supplement: c5ob00999e1.pdf [file c5ob00999e1.pdf]

## Electronic Supplementary Information

Small polyanion recognition of triazolium cyclodextrin click cluster in water

Hoa Thi Le<sup>1</sup>, Seung Cheol Park<sup>2</sup>, Chulhun Kang<sup>1</sup>, Choon Woo Lim<sup>3\*</sup>, Tae Woo Kim<sup>1\*</sup>

### Table of Contents

|                                                                         |                    |
|-------------------------------------------------------------------------|--------------------|
| S1. Synthesis & Characterization.....                                   | 2                  |
| S1-1. Synthesis of cyclodextrin derivatives .....                       | 2                  |
| S1-2. NMR characterization of <b>5</b> .....                            | 4                  |
| S2. Fluorescence-pH dependence of cF and <b>5</b> /cF complex .....     | 9                  |
| S3. Binding constant of 5-carboxyfluorescein/cyclodextrin complex ..... | 10                 |
| S4. Competitive binding study .....                                     | 13                 |
| S4-1. Corner's equation for competitive binding study .....             | 13                 |
| S4-2. Competitive binding experiment of <b>5</b> .....                  | 14                 |
| S4-3. Competitive binding experiment of <b>6</b> .....                  | 20                 |
| S5. pH-dependent solubility of <b>5</b> and <b>6</b> .....              | 25                 |
| S6. Fluorescence titration of <b>5</b> /cF complex.....                 | 26                 |
| <a href="#">S7. Molecular Modeling of cF.....</a>                       | <a href="#">27</a> |
| References .....                                                        | 27                 |

## S1. Synthesis & Characterization

### S1-1. Synthesis of cyclodextrin derivatives

#### A. Hexakis{6-chloro-6-deoxy}- $\alpha$ -cyclodextrin (**2**) and hexakis{6-azido-6-deoxy}- $\alpha$ -cyclodextrin (**3**)

$\alpha$ -Cyclodextrin was purchased from TCI (C0776) and dried in vacuum at 80 °C for at least 5 h before using. **2** and **3** were prepared by Jean-Marie Lehn's procedure and the spectra of  $^1\text{H}$ ,  $^{13}\text{C}$  NMR are consistent with the literature.<sup>1</sup>

Compound **2**.  $^1\text{H}$  NMR (DMSO- $d_6$ , 300 MHz):  $\delta$  5.76 (d,  $J = 5.4$ , 6H), 5.59 (s, 6H), 4.92 (d,  $J = 3.2$ , 6H), 4.13 – 3.89 (m, 12H), 3.90 – 3.71 (m, 12H), 3.44 (t,  $J = 8.9$ , 6H), 3.36 (s, 6H);  $^{13}\text{C}$  NMR (DMSO- $d_6$ , 75 MHz): 101.8, 83.5, 72.5, 71.5, 70.7, 45.1.

Compound **3**.  $^1\text{H}$  NMR (300 MHz, DMSO- $d_6$ ):  $\delta$  5.60 (br, 6H, OH), 5.42 (br, 6H, OH), 4.81 (d,  $J = 2.5$  Hz, 6H, H1'), 3.76-3.65 (m, 18H), 3.56-3.49 (m, 6H), 3.34-3.30 (m, 12H);  $^{13}\text{C}$  NMR (DMSO- $d_6$ , 75 MHz): 101.7, 83.4, 72.7, 71.6, 70.4, 51.3.

#### B. 6-amino-6-deoxy- $\alpha$ -cyclodextrin hydrochloride (**6**)

Compound **6** was prepared according to a literature procedure.<sup>2</sup> The spectra of  $^1\text{H}$ ,  $^{13}\text{C}$  NMR are consistent with the literature.<sup>3</sup>

$^1\text{H}$  NMR (300 Hz, D<sub>2</sub>O):  $\delta$  5.18 (d,  $J = 2.91$ , 6H, H<sub>1</sub>), 4.21 (m, 6H, H<sub>5</sub>), 4.03 (app t, 6H, H<sub>3</sub>), 3.69 (dd,  $J = 3.1$ , 10.1, 6H, H<sub>2</sub>), 3.61 (app t, 6H, H<sub>4</sub>), 3.46 (dd,  $J = 3.2$ , 13.7, 6H, H<sub>6</sub>), 3.28 (dd, 6H, H<sub>5</sub>), 3.56 (app dd,  $J = 6.4$ , 13.5, 6H, H<sub>6</sub>);  $^{13}\text{C}$  NMR (75 MHz, D<sub>2</sub>O): 101.96 (C<sub>1</sub>), 83.10 (C<sub>4</sub>), 73.24 (C<sub>3</sub>), 72.02 (C<sub>2</sub>), 68.86 (C<sub>5</sub>), 41.05 (C<sub>6</sub>).

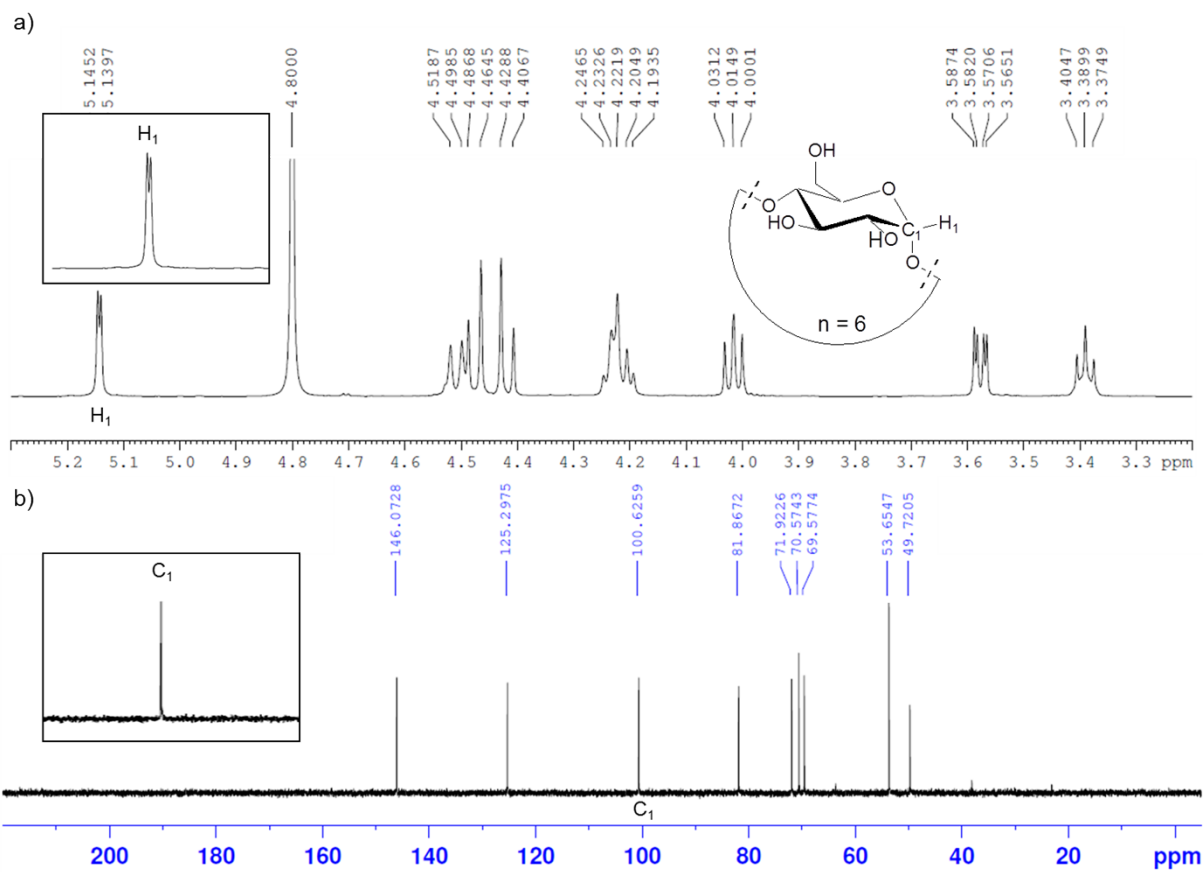

Figure S1-1. Partial NMR spectra of **4**. a)  $^1\text{H}$  NMR( $\text{D}_2\text{O}$ , 600 MHz) and b)  $^{13}\text{C}$  NMR( $\text{D}_2\text{O}$ , 150 MHz)

## S1-2. NMR characterization of **5**

Figure S1-2A.  $^1\text{H}$  NMR spectrum ( $\text{D}_2\text{O}$ , 600 MHz) of **5**

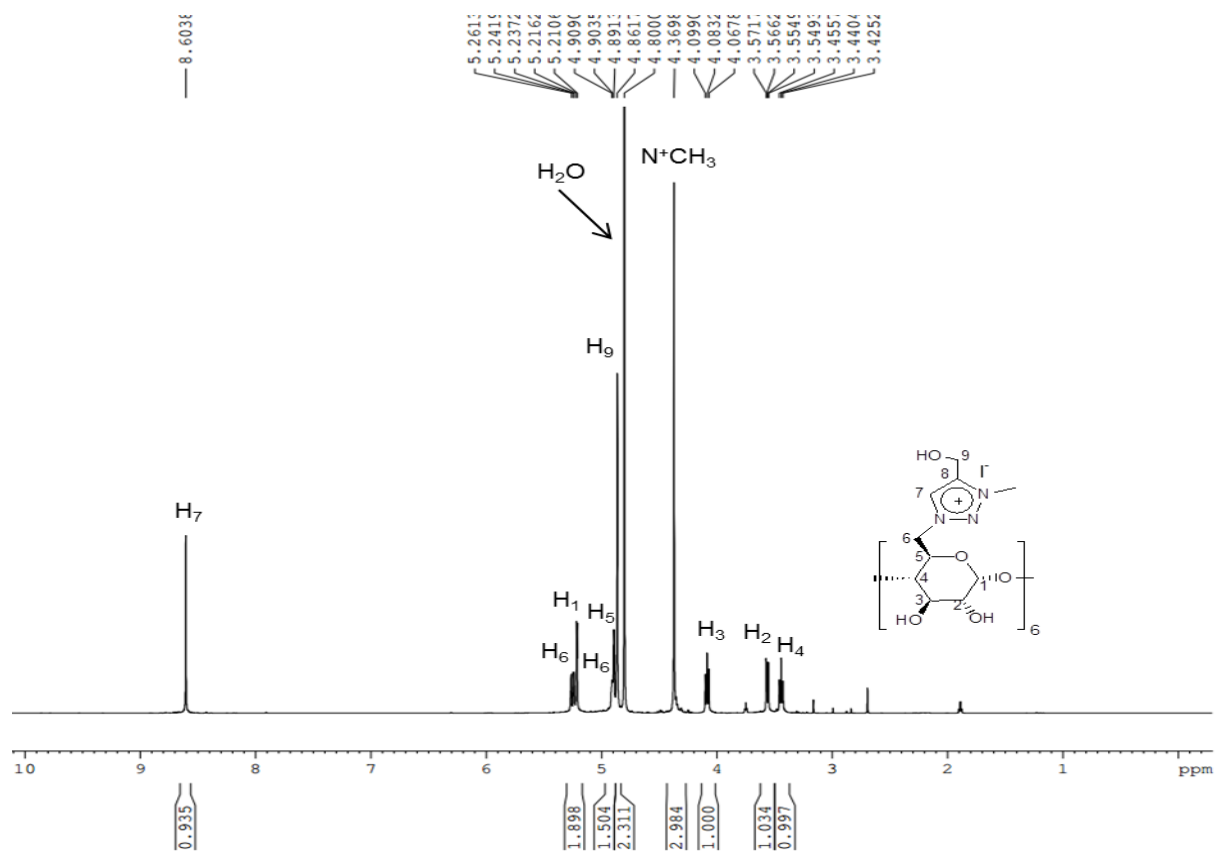

Figure S1-2B.  $^{13}\text{C}$  NMR spectrum ( $\text{D}_2\text{O}$ , 600 MHz) of **5**

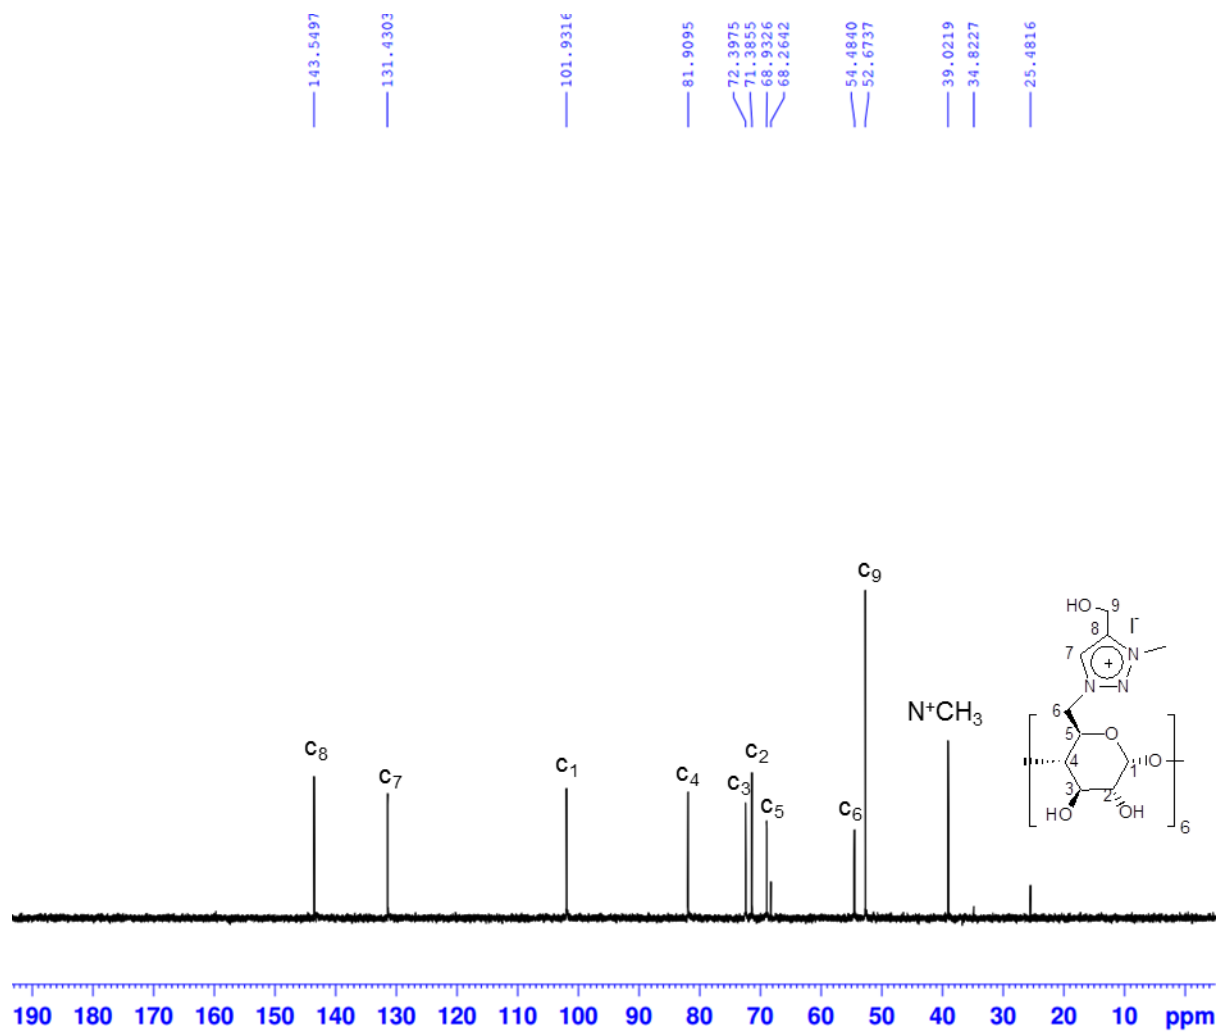

Figure S1-2C. Partial HH COSY spectrum (D<sub>2</sub>O, 600 MHz) of the glucose part of 5

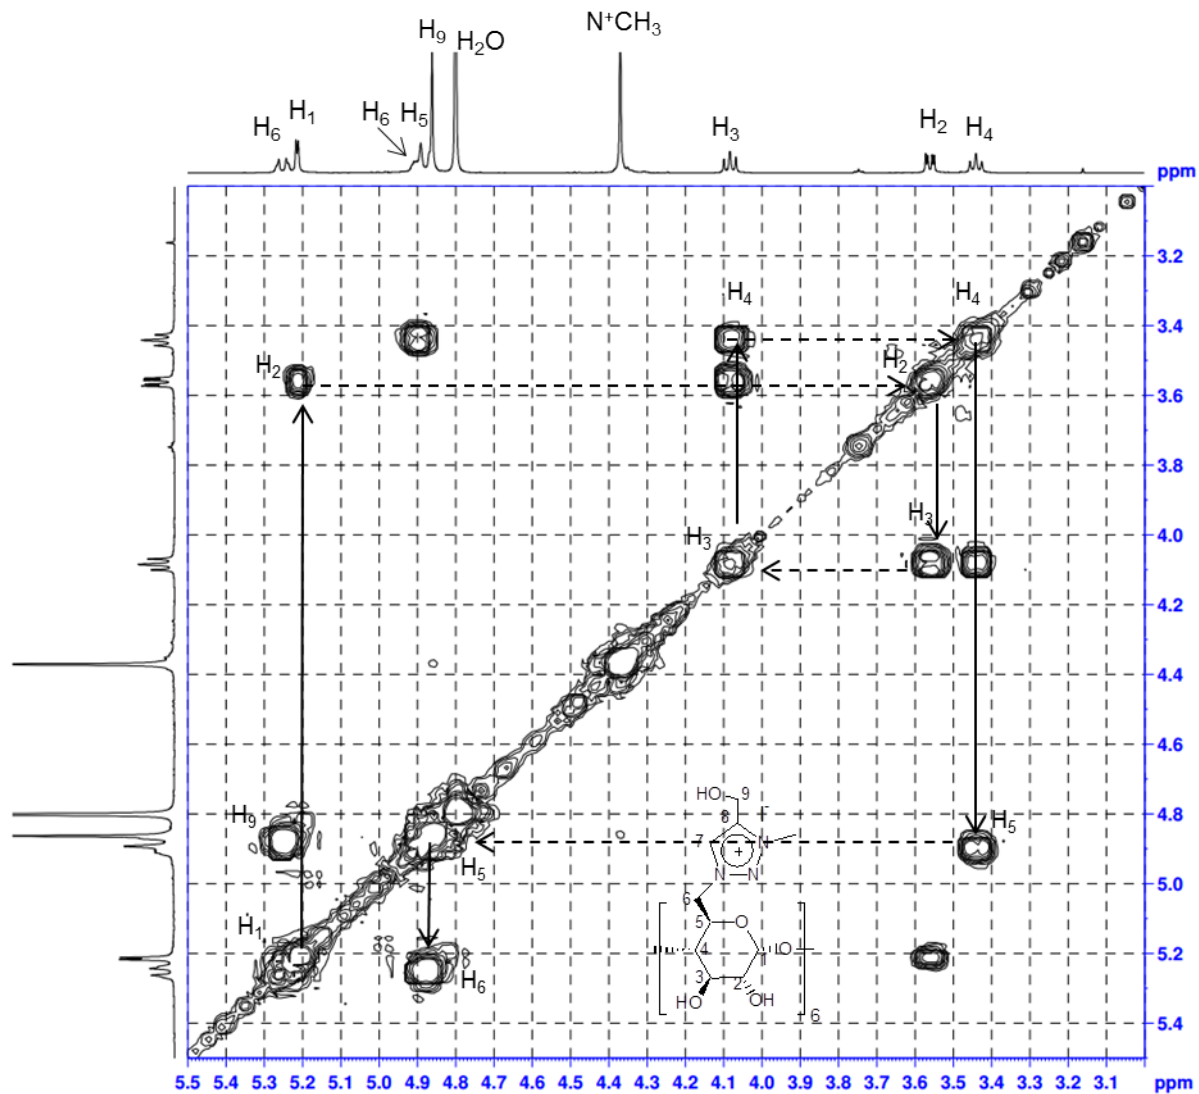

Figure S1-2D. HSQC spectrum (D<sub>2</sub>O, 600 MHz) of **5** (↓ contour: CH<sub>2</sub> connectivity).

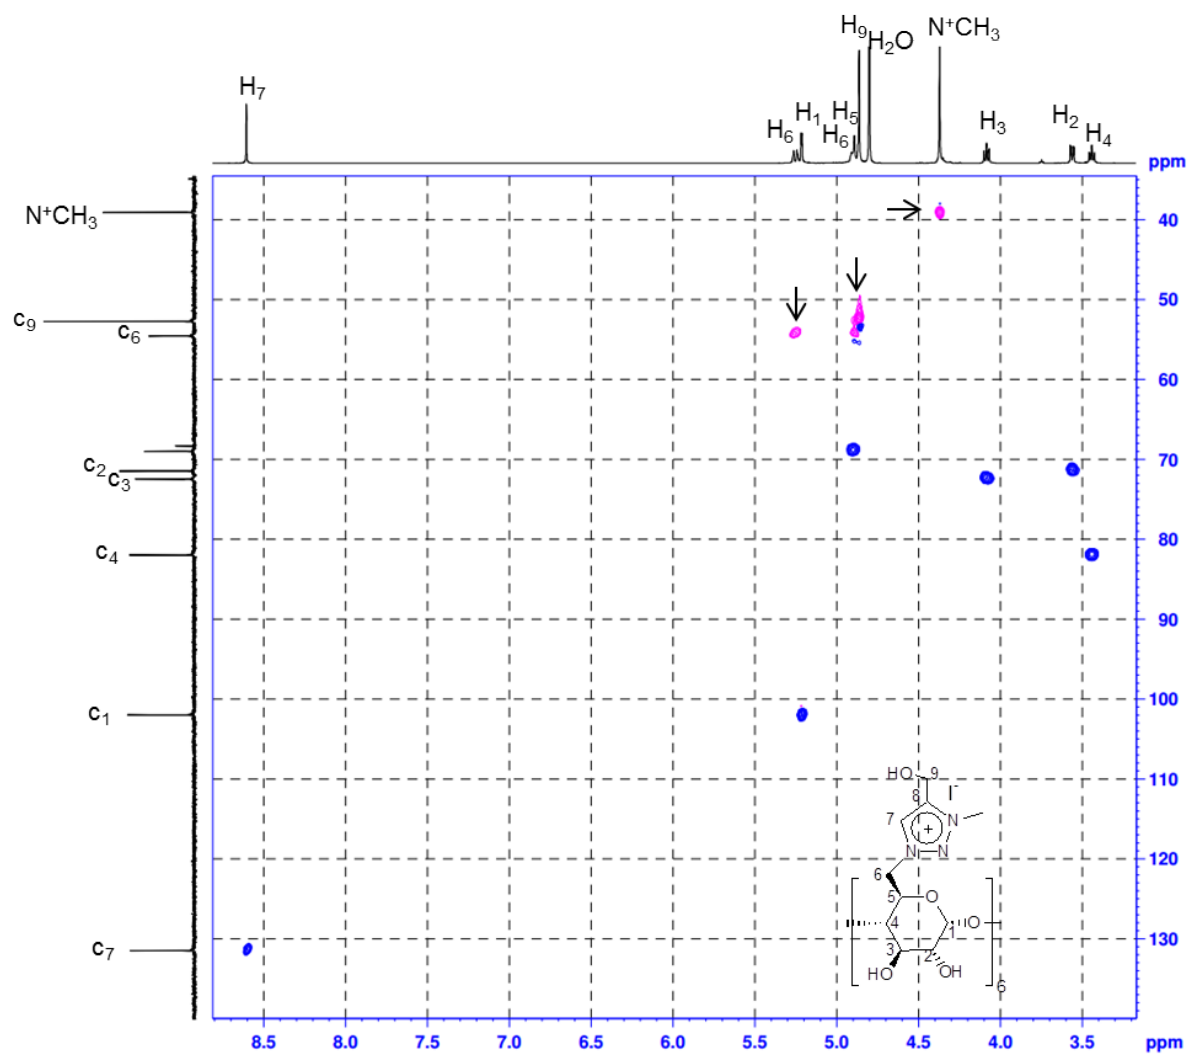

Figure S1-2E. ESI-MS of **5**

Instrument: Q-Exactive (Thermo); Injection: Direct Infusion; Sample concentration: 10 pmol/  $\mu\text{L}$

Isotope pattern was calculated from Isotope Pattern Calculator v4.0 (<http://yanjunhua.tripod.com/pattern.htm>)

a) Full mass spectrum

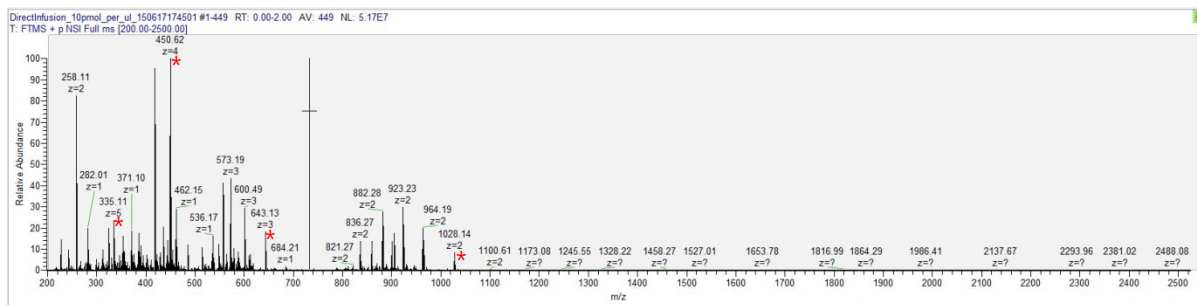

Multi-charge peak peaking (red asterisk): 1028.14 for  $[\text{M} - 2\text{I}]^{2+}$ , 643.13 for  $[\text{M} - 3\text{I}]^{3+}$ , 450.62 for  $[\text{M} - 4\text{I}]^{4+}$ , 335.11 for  $[\text{M} - 5\text{I}]^{5+}$

b) Isotope pattern analysis of  $[\text{M} - 2\text{I}]^{2+}$

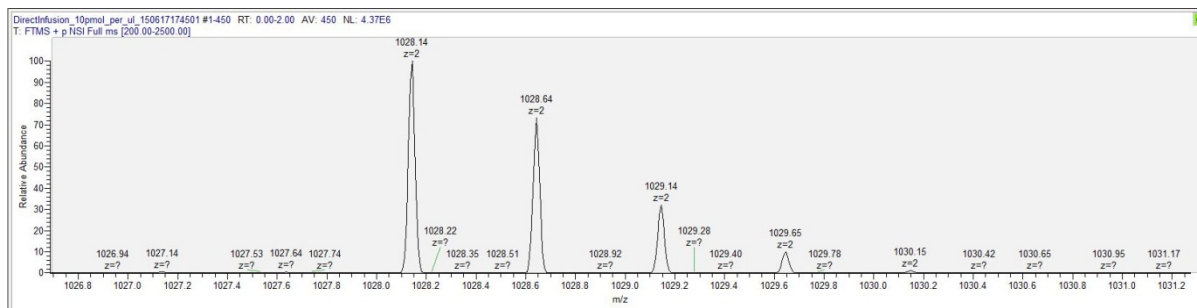

| Calculated |             |                    | Observed |             |
|------------|-------------|--------------------|----------|-------------|
| Exact mass | % abundance | Z=2 corrected mass | Peak     | % abundance |
| 2056.27    | 100         | 1028.14            | 1028.14  | 100         |
| 2057.28    | 65          | 1028.64            | 1028.64  | 73          |
| 2058.28    | 21          | 1028.14            | 1028.14  | 32          |

Mass peaks which relative abundances are more than 10 % are listed



## S2. Fluorescence-pH dependence of cF and 5/cF complex

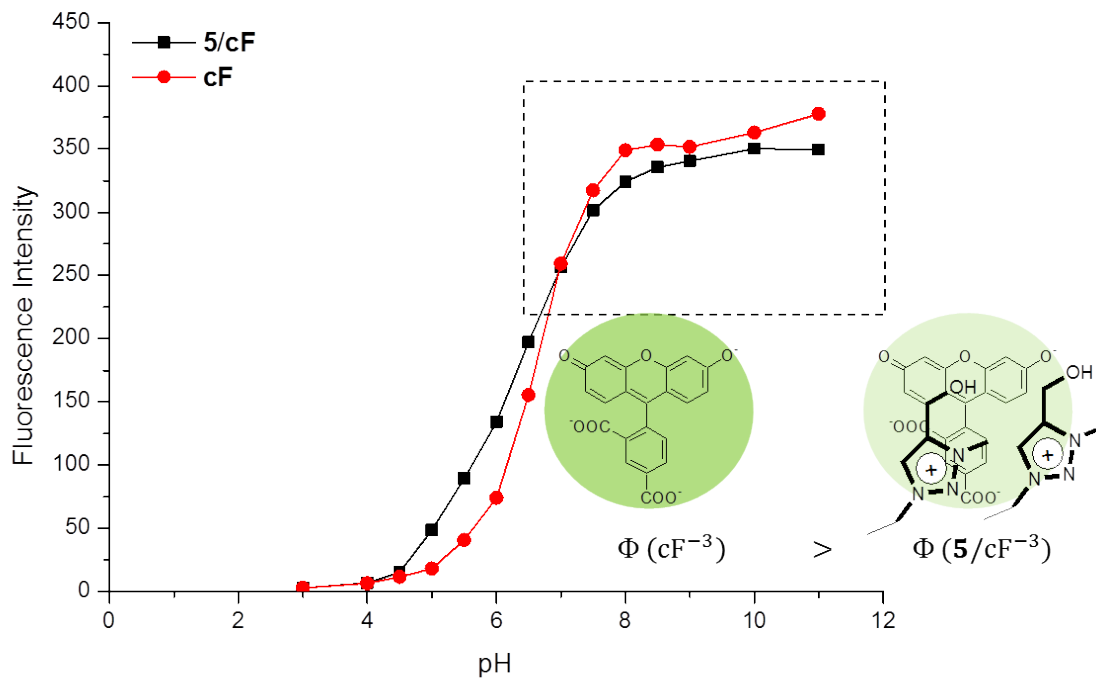

Figure S2. The Fluorescence intensity changes of cF (0.2  $\mu\text{M}$ ) and 5/cF complex (cF = 0.2  $\mu\text{M}$ , 5 = 20  $\mu\text{M}$ ) as a function of pH in 0.05 % DMSO. 10 mM HEPES buffer was adjusted pH at range 3 – 11 using HCl or NaOH by pH meter. The fluorescence was excited at 490 nm and the emission was measured at 524 nm (excitation/emission slit: 3/1.5).  $\Phi(i)$  = quantum efficiency of species  $i$ .

### S3. Binding constant of 5-carboxyfluorescein/cyclodextrin complex

#### *Benesi-Hildebrand equation*

The binding constant ( $K_1$ ) in case of 1:1 complexation of cF to cyclodextrin (CD) and the correlation equation between  $K_1$  and observed values are given by:

$$K_1 = \frac{[CD \cdot cF]}{[CD][cF]}$$

and

$$\frac{b}{\Delta A} = \frac{1}{[cF]_t K_1 \Delta \varepsilon [CD]} + \frac{1}{[cF]_t \Delta \varepsilon}$$

In this system  $[CD]_t$  is much larger than  $[cF]_t$ , and it is appropriate to set  $[CD] = [CD]_0$  (t and 0 means total and initial concentration).  $\Delta A$  and  $\Delta \varepsilon$  are the differences in the absorbance and in the molar extinction coefficient between cF and cF/CD solution.

#### *Measurement*

A working solution of cF (14  $\mu\text{M}$ ) was prepared in HEPES (10 mM, pH 7.4):methanol (1:1, v/v). The stock solutions of **5** (200  $\mu\text{M}$ ) was serially diluted with the cF working solution to give 120, 80, 40, 20, 16, 12, 8  $\mu\text{M}$ . The stock solutions of **6** (200  $\mu\text{M}$ ) was serially diluted with cF working solution to give 120, 90, 70, 60, 35, 25, 20, 12, 8  $\mu\text{M}$ . The  $\Delta A$  values at various concentrations of CD were measured at  $\lambda_{\text{max}}$  (498 nm) of cF. The binding constants ( $K_1$ ) were calculated from the slopes and y-intercepts of  $1/[CD]$  vs.  $1/[\Delta A]$  plotting;  $K_1 = (\text{y-intercept})/(\text{slope})$

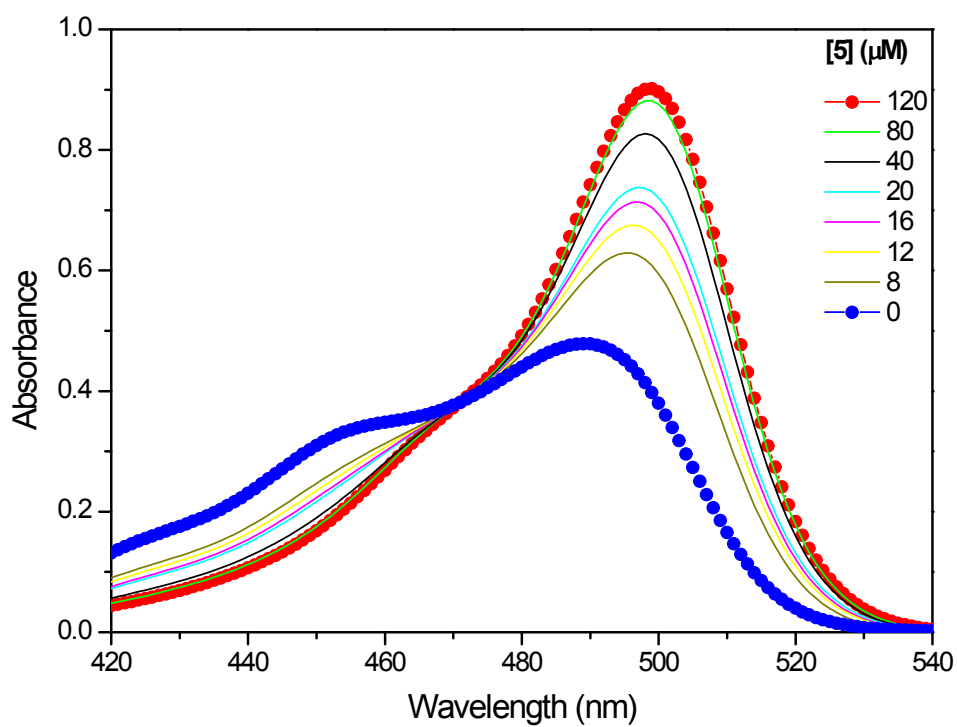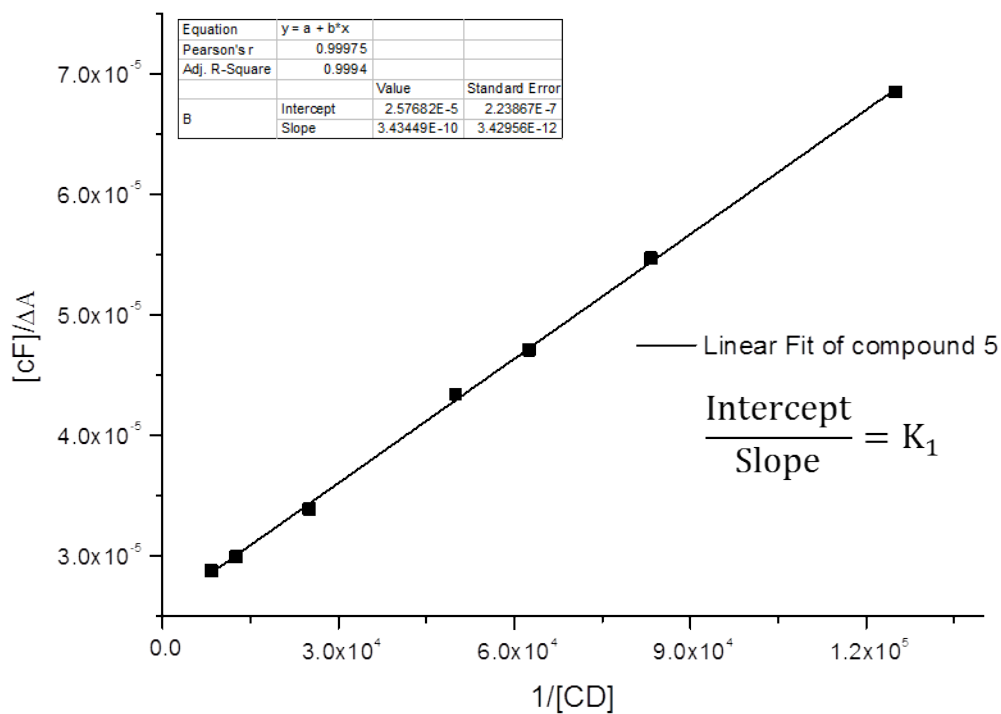

Figure S3-1. UV/vis titration of cF (14  $\mu\text{M}$ ) with 5.  $1/[\text{CD}]$  vs.  $1/[\Delta\text{A}]$  plotting at 498 nm. Inset: binding constant calculation.

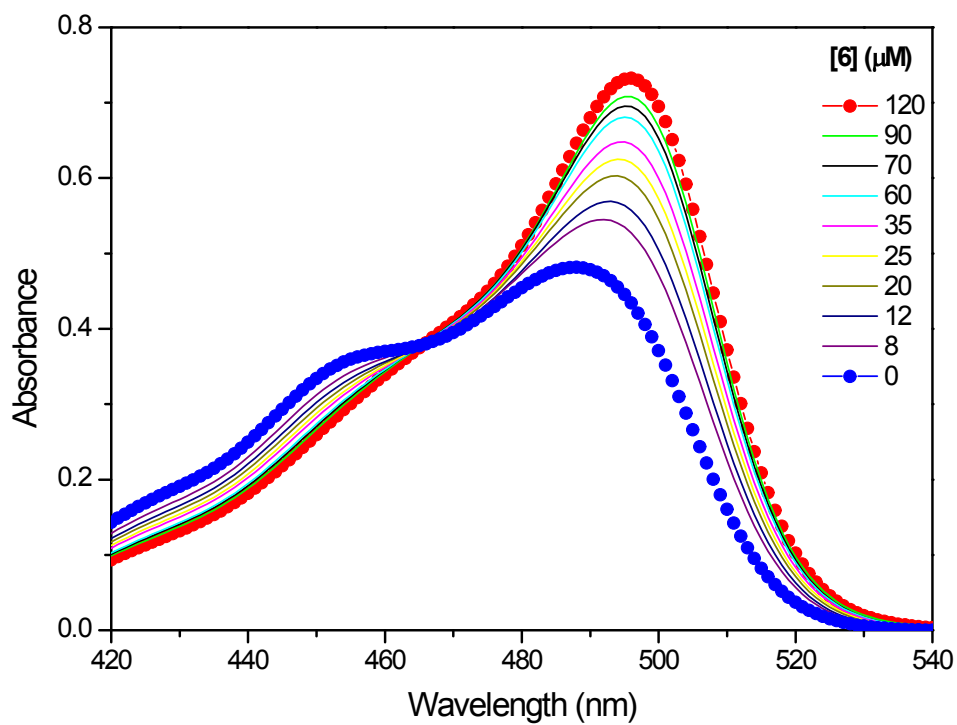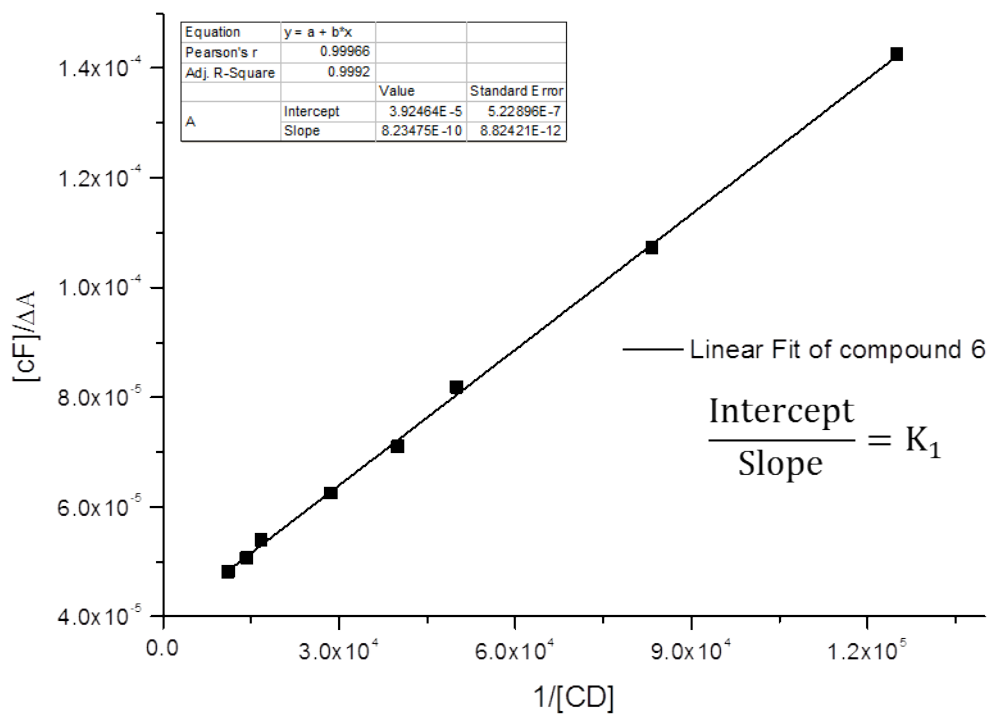

Figure S3-2. UV/vis titration of cF (14 μM) with compound 6.  $1/[CD]$  vs.  $1/[\Delta A]$  plotting at 498 nm. Inset: binding constant calculation.

## S4. Competitive binding study

### S4-1. Corner's equation for competitive binding study

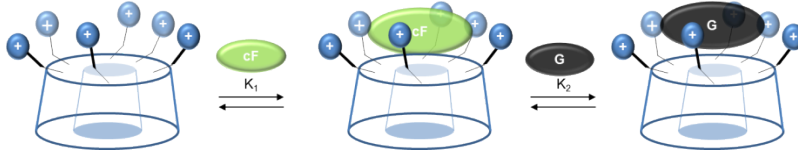

*Equation*

The competitive binding constant ( $K_2$ ) in case of 1:1 complexation of G to CD and the correlation equation between  $K_2$  and observed values are

$$K_2 = \frac{[CD \cdot G]}{[CD][G]}$$

and

$$\frac{[G]_t}{P} = \frac{K_1}{K_2} Q + 1$$

The quantity P is defined as

$$P = [CD]_t - \frac{1}{QK_1} - \frac{[cF]_t}{Q + 1}$$

The cF ratio Q can be obtained from

$$Q = \frac{\varepsilon - \varepsilon_{CD.cF}}{\varepsilon_{cF} - \varepsilon}$$

The total cF concentration is constant in all solutions, thus  $\varepsilon$  can be replaced by A.

$$Q = \frac{A - A_{CD.cF}}{A_{cF} - A}$$

where  $A_{cF}$  and  $A_{CD.cF}$  are the absorbance of free and complexed cF, respectively, and A is the apparent absorbance in any solution containing both forms. For optimum results, Q values in the range 0.3-3 were chosen

## Measurement

Addition of guests (IP<sub>3</sub>, Phytic acid, ATP, EDTA, glucose-6-phosphate, and glucose) to the complex solution formed between **5**/**6** and cF ([**5**] = [**6**] = 110 μM, [cF] = 14 μM) resulted in the displacement of cF by the guests. The competitive binding constants (K<sub>2</sub>) were calculated from the slopes of Q vs. [G]<sub>t</sub>/P plotting and from the K<sub>1</sub> of SI S4.

### S4-2. Competitive binding experiment of **5**

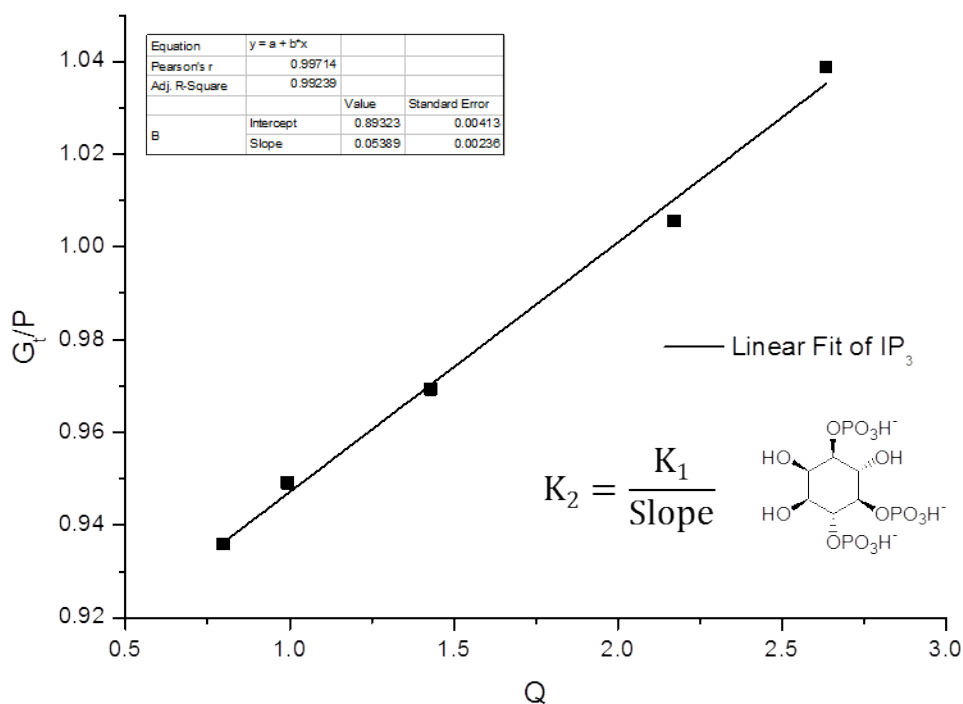

Figure S4-2A. Plotting of **5**/cF complex ([**5**] = 110 μM, [cF] = 14 μM) with IP<sub>3</sub>. Inset: 1/[CD] vs. 1/[ΔA] plotting at 498 nm and binding constant calculation.

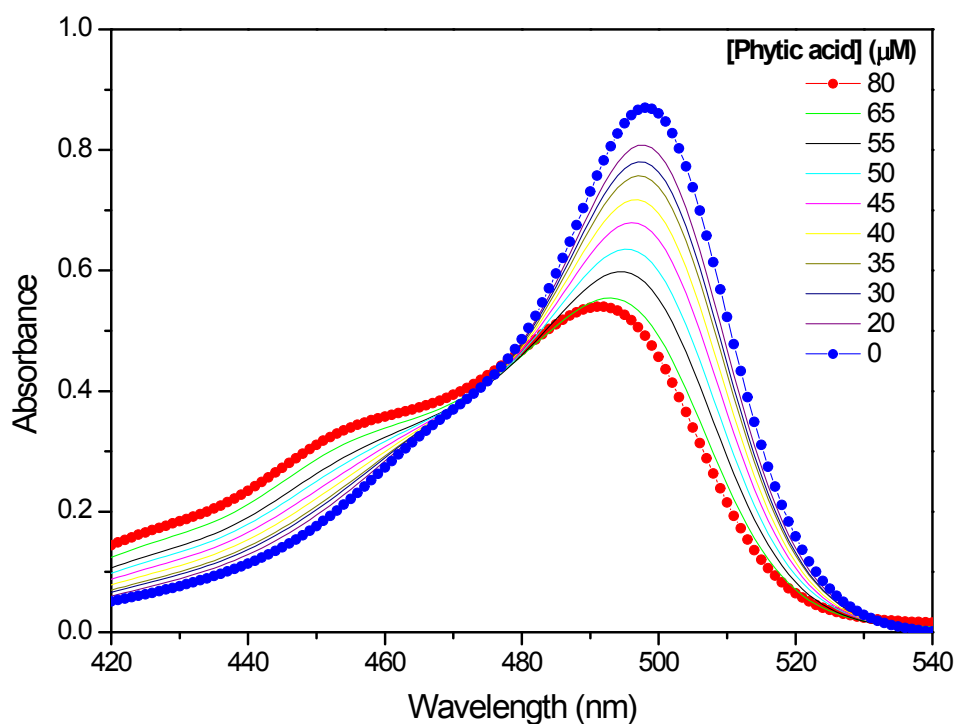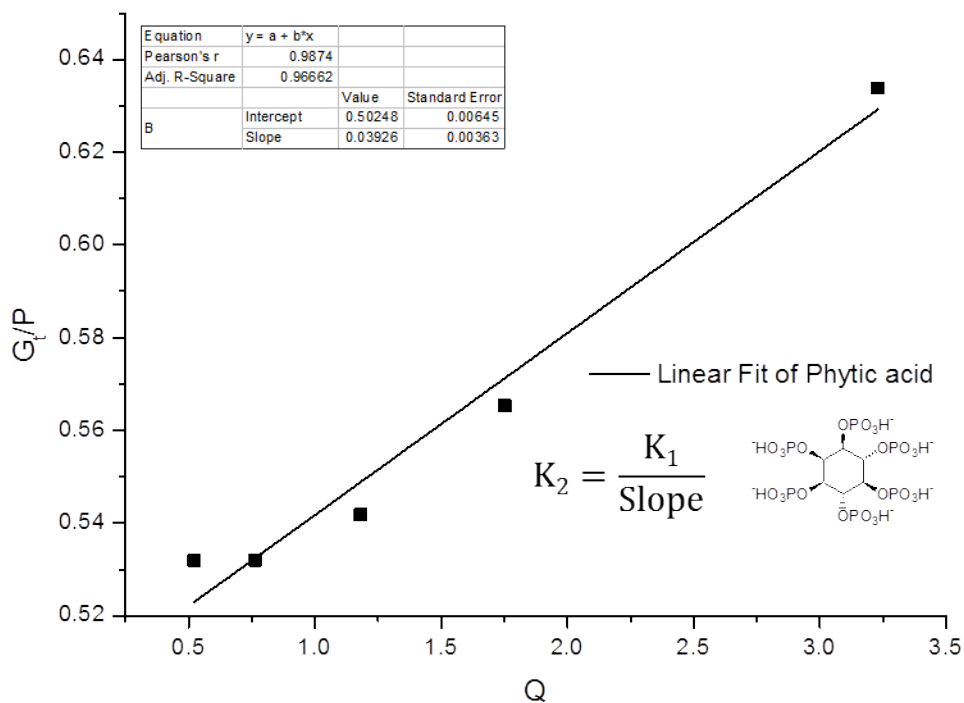

Figure S4-2B. Competitive UV/vis titration and plotting of **5**/cF complex ( $[5] = 110 \mu\text{M}$ ,  $[cF] = 14 \mu\text{M}$ ) with Phytic acid. Inset:  $1/[CD]$  vs.  $1/[\Delta A]$  plotting at 498 nm and binding constant calculation.

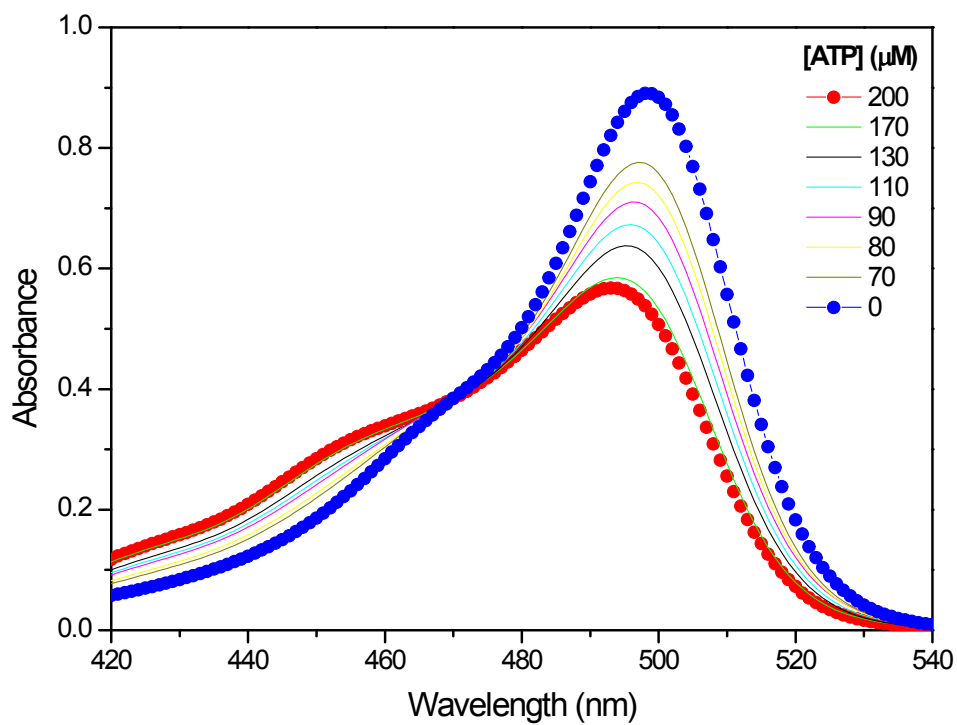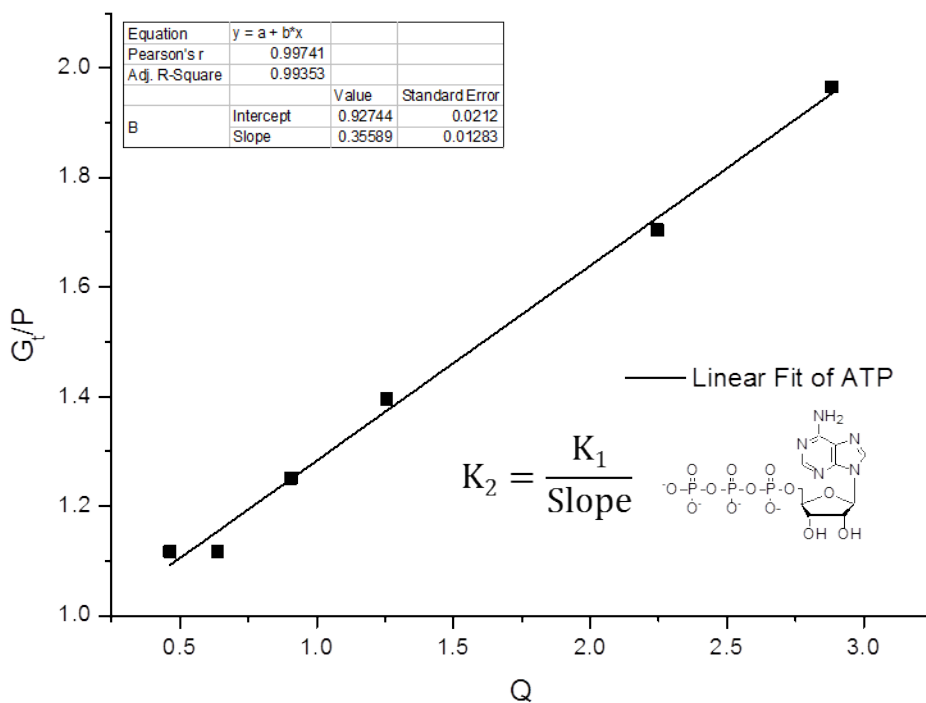

Figure S4-2C. Competitive UV/vis titration and plotting of **5**/cF complex ( $[5] = 110 \mu\text{M}$ ,  $[cF] = 14 \mu\text{M}$ ) with ATP. Inset:  $1/[CD]$  vs.  $1/[\Delta A]$  plotting at 498 nm and binding constant calculation.



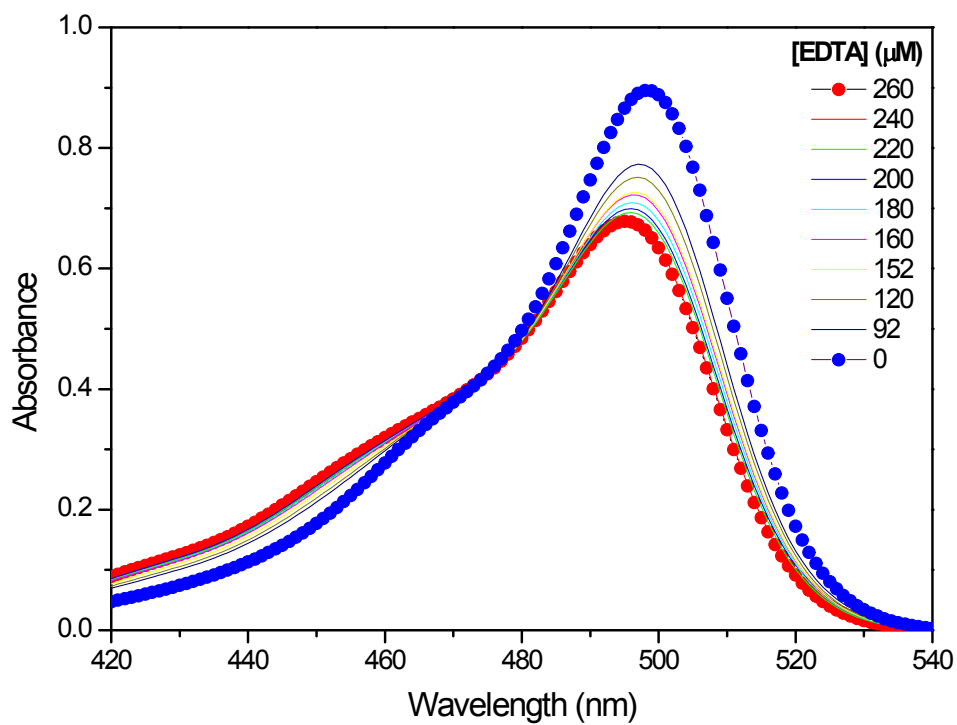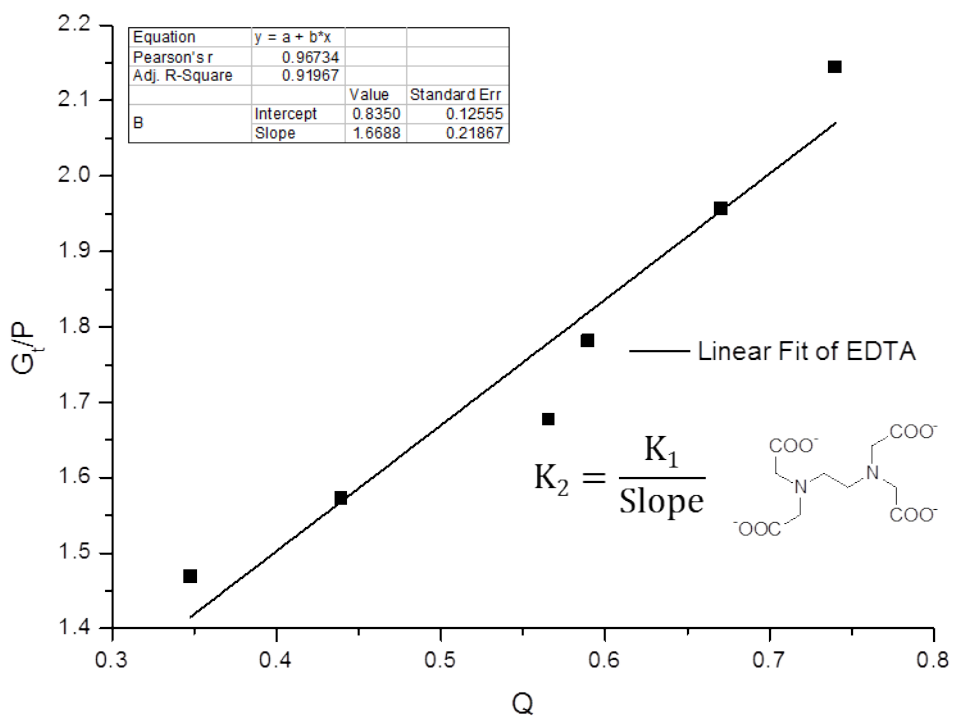

Figure S4-2D. Competitive UV/vis titration and plotting of 5/cF complex ( $[5] = 110 \mu\text{M}$ ,  $[cF] = 14 \mu\text{M}$ ) with EDTA. Inset:  $1/[CD]$  vs.  $1/[\Delta A]$  plotting at 498 nm and binding constant calculation.

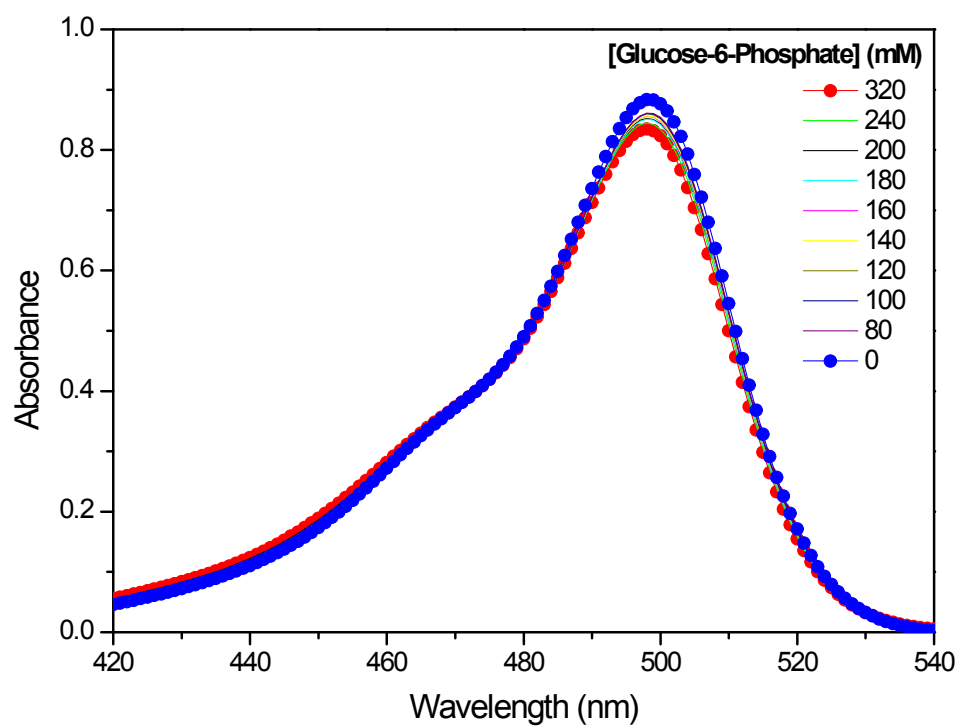

Figure S4-2E. Competitive UV/vis titration of 5/cF complex ( $[5] = 110 \mu\text{M}$ ,  $[cF] = 14 \mu\text{M}$ ) with glucose-6-phosphate.

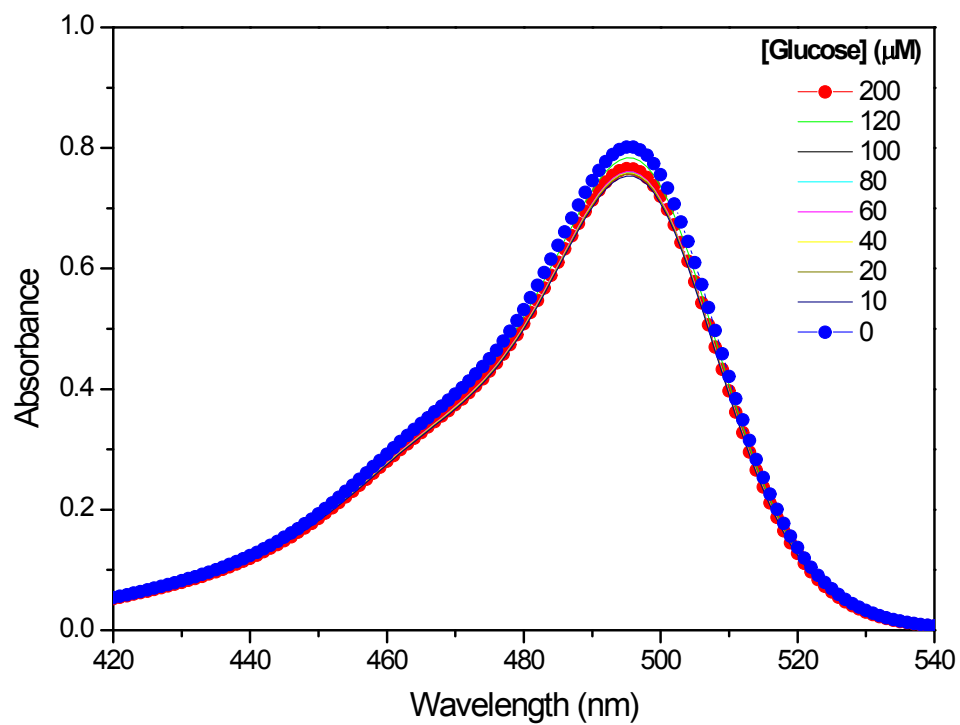

Figure S4-2F. Competitive UV/vis titration of 5/cF complex ( $[5] = 110 \mu\text{M}$ ,  $[cF] = 14 \mu\text{M}$ ) with glucose.

### S4-3. Competitive binding experiment of 6

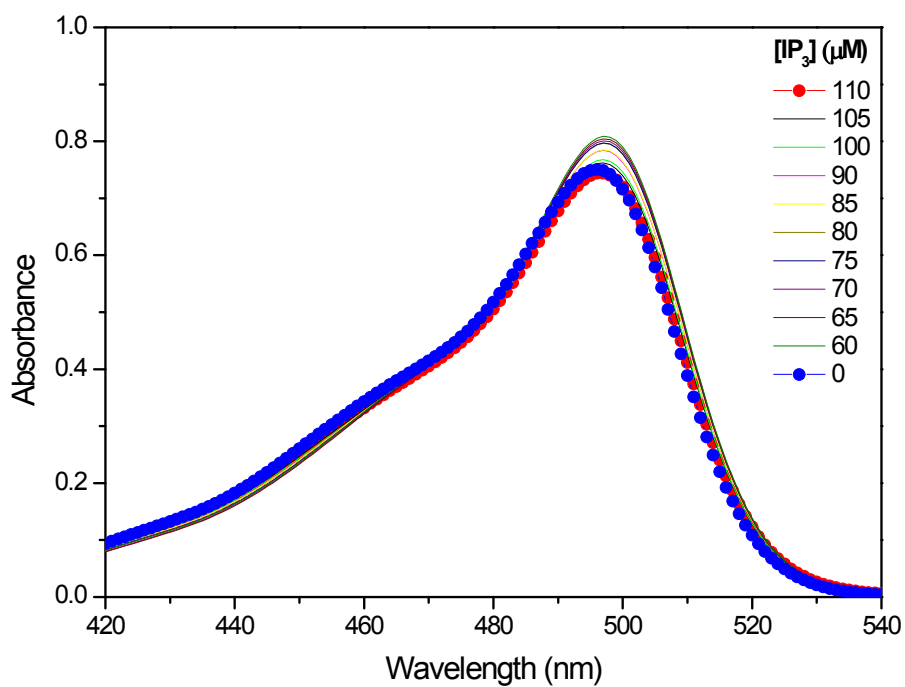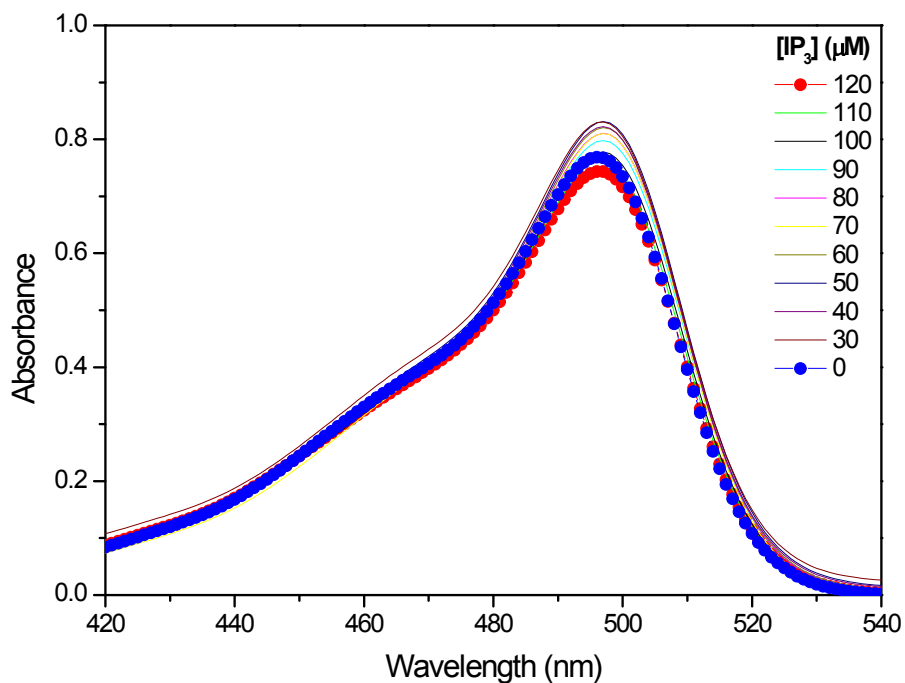

Figure S4-3A. Two independent measurements: Competitive UV/vis titration of 6/cF complex ( $[6] = 110 \mu\text{M}$ ,  $[cF] = 14 \mu\text{M}$ ) with IP<sub>3</sub>.

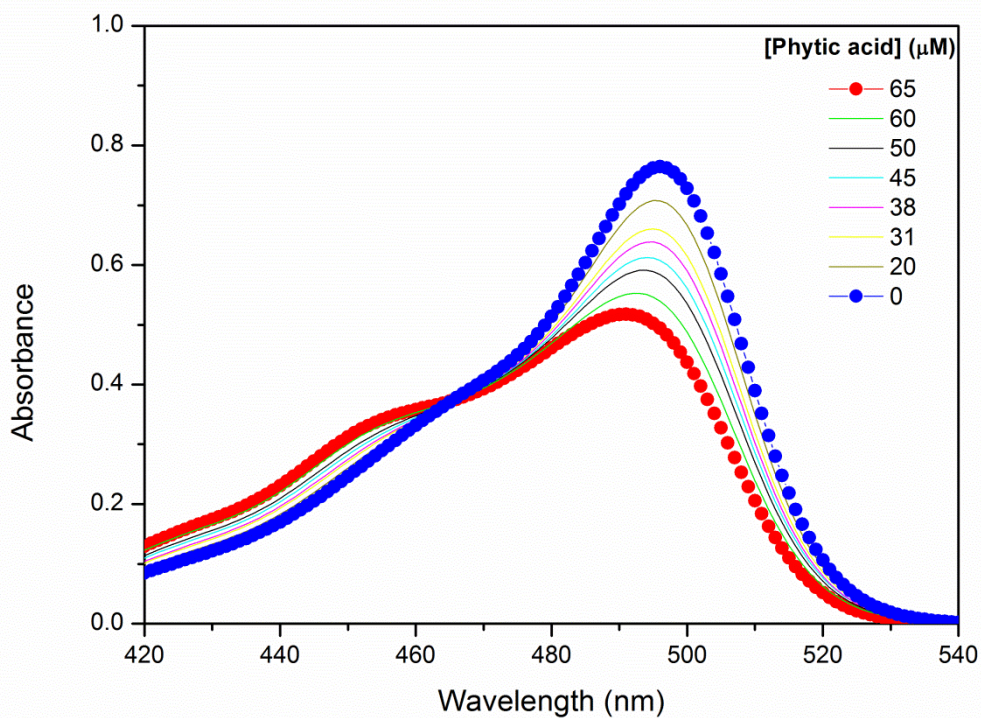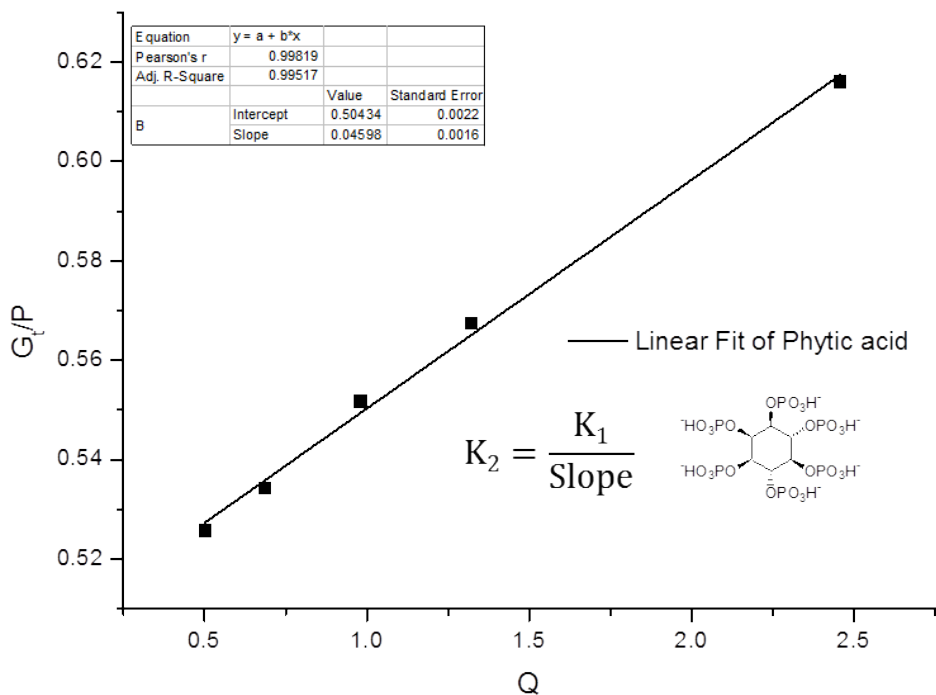

Figure S4-3B. Competitive UV/vis titration and plotting of 6/cF complex ([6] = 110 μM, [cF] = 14 μM) with phytic acid. Inset: 1/[CD] vs. 1/[ΔA] plotting at 498 nm and binding constant calculation.

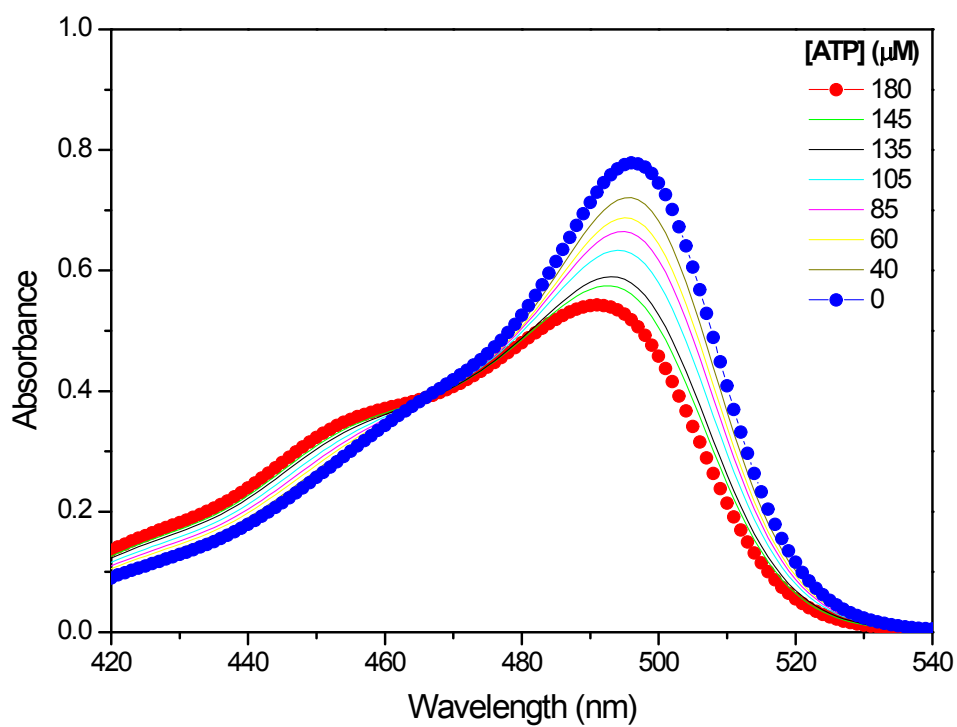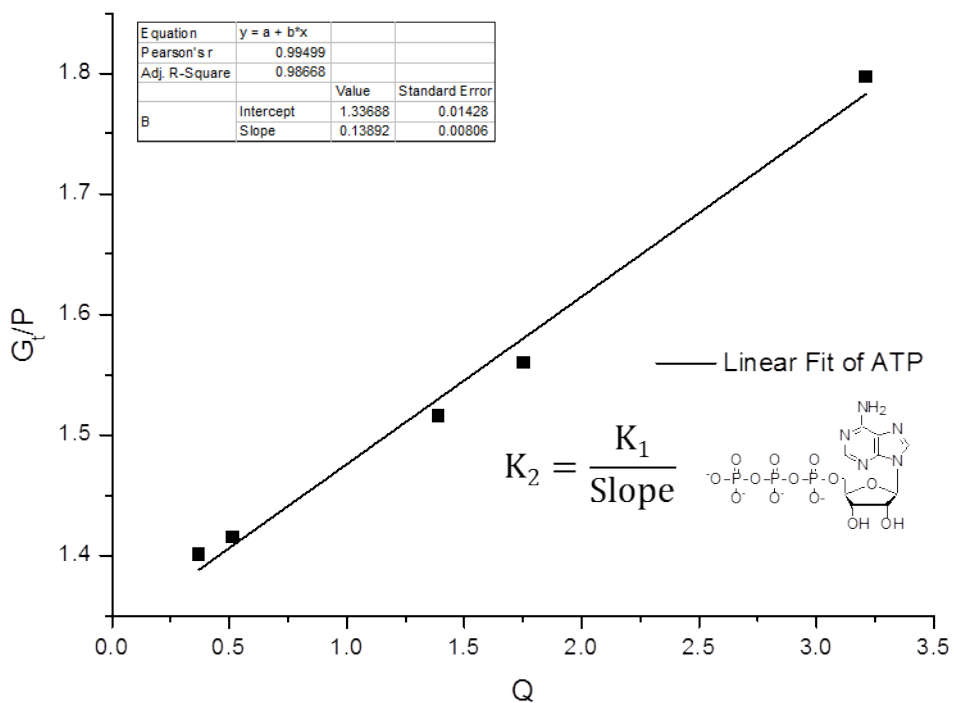

Figure S4-3C. Competitive UV/vis titration and plotting of **6**/cF complex ( $[6] = 110 \mu\text{M}$ ,  $[cF] = 14 \mu\text{M}$ ) with ATP. Inset:  $1/[CD]$  vs.  $1/[\Delta A]$  plotting at 498 nm and binding constant calculation.

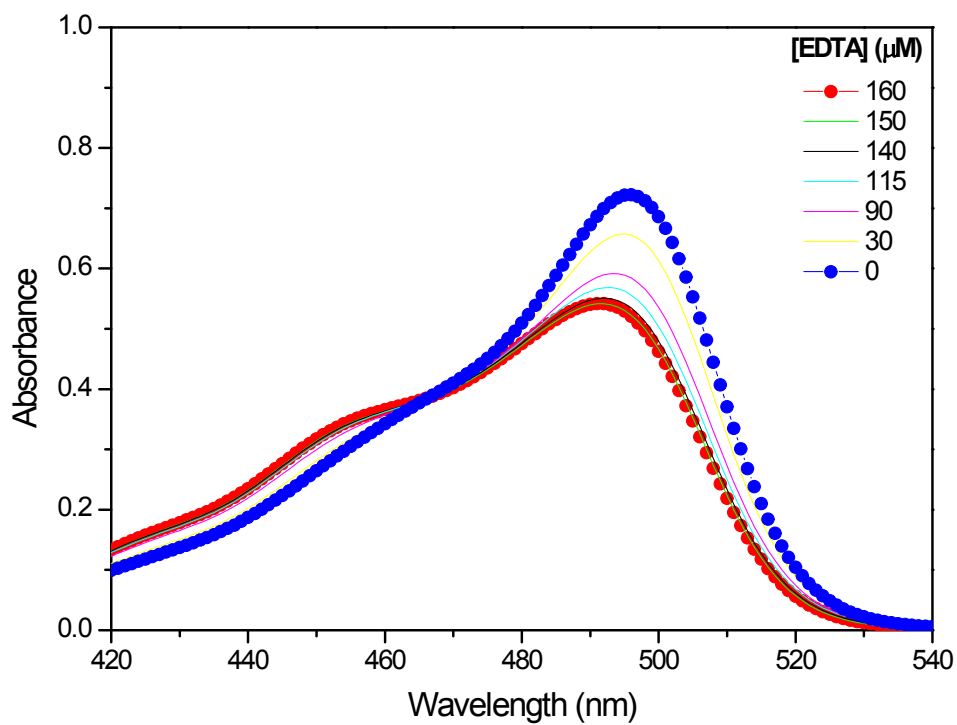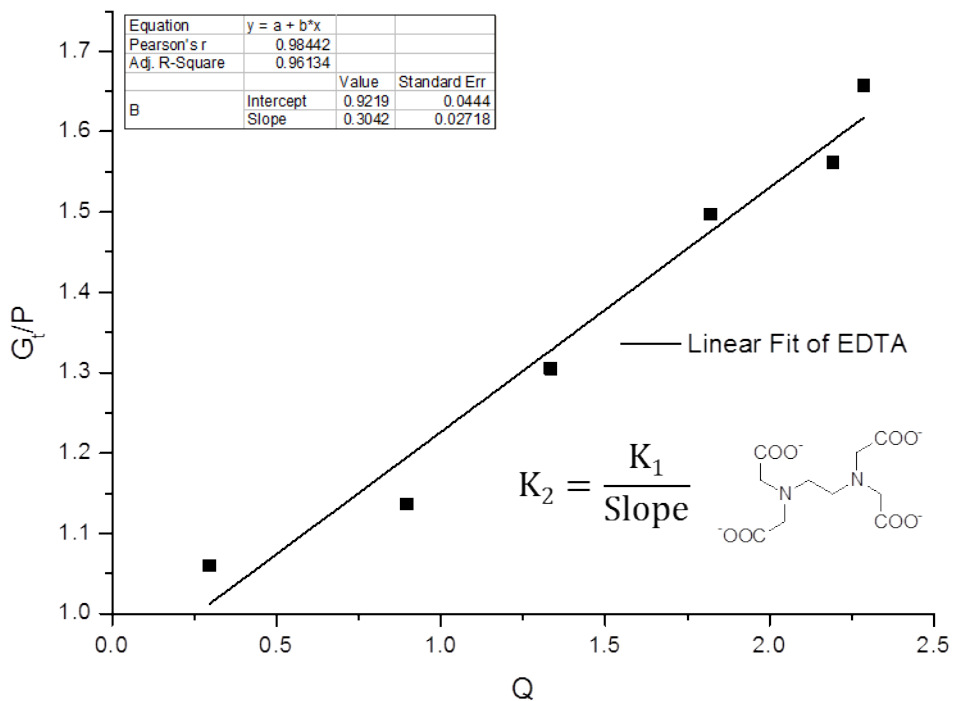

Figure S4-3D. Competitive UV/vis titration and plotting of 6/cF complex ( $[6] = 110 \mu\text{M}$ ,  $[cF] = 14 \mu\text{M}$ ) with EDTA. Inset:  $1/[CD]$  vs.  $1/[\Delta A]$  plotting at 498 nm and binding constant calculation.

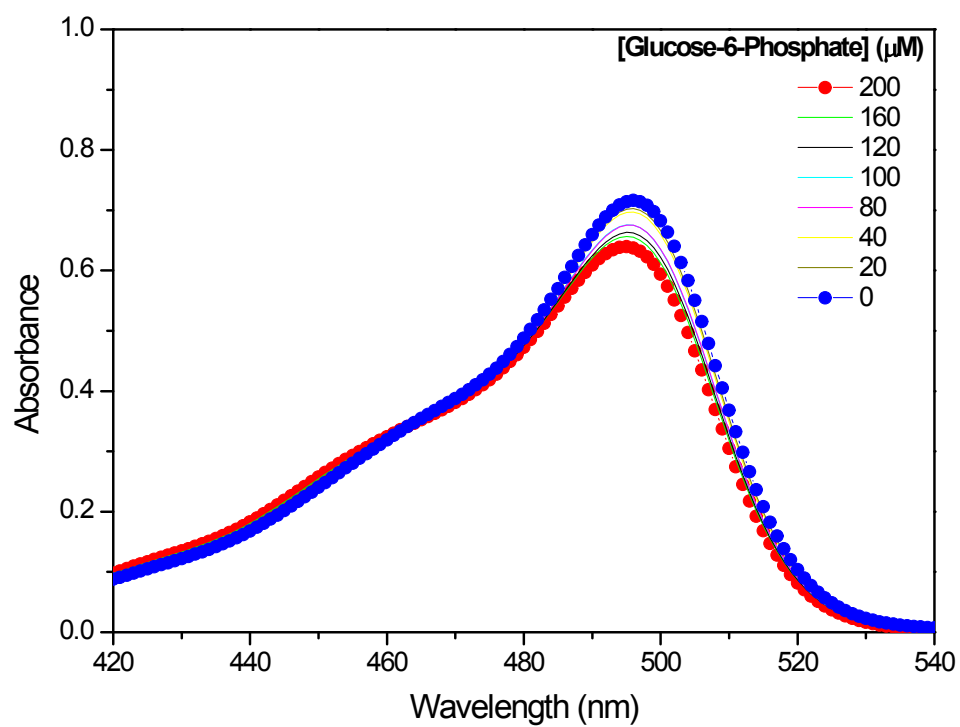

Figure S4-3E. Competitive UV/vis titration of 6/cF complex ( $[\mathbf{6}] = 110 \mu\text{M}$ ,  $[\text{cF}] = 14 \mu\text{M}$ ) with glucose-6-phosphate.



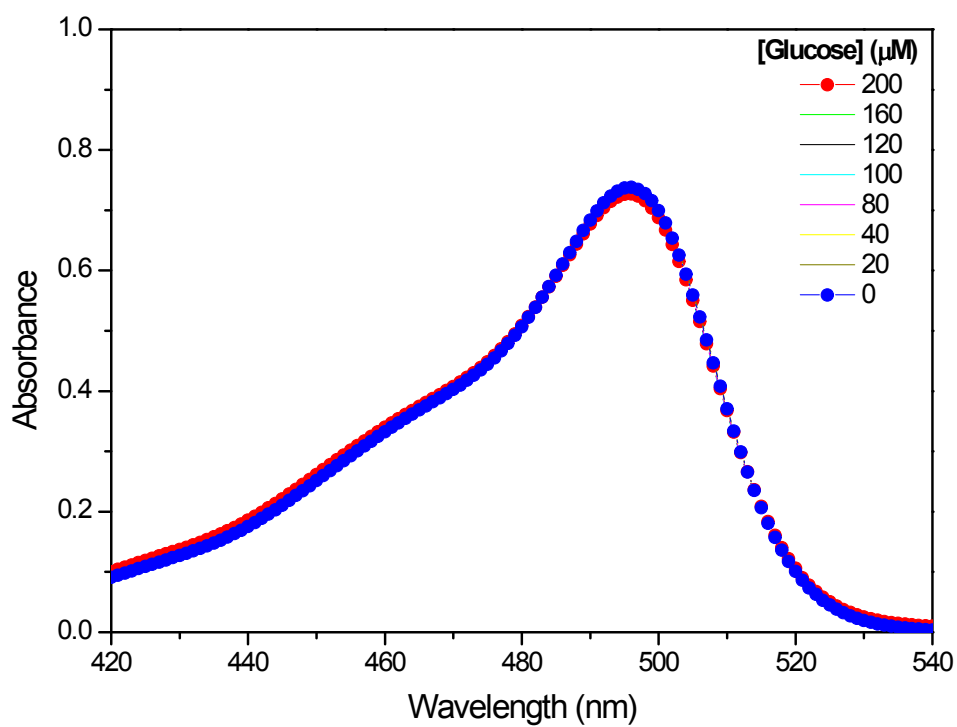

Figure S4-3F. Competitive UV/vis titration of 6/cF complex ( $[6] = 110 \mu\text{M}$ ,  $[cF] = 14 \mu\text{M}$ ) with glucose.

### S5. The pH-dependent solubility of 5 and 6

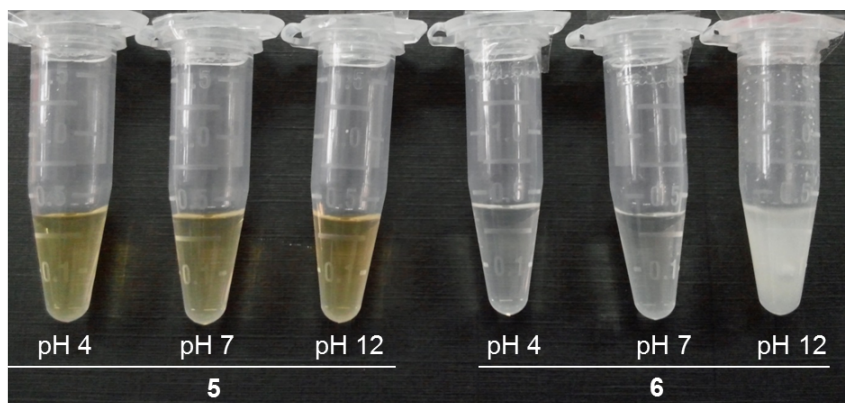

Figure S5. Photograph: Turbidity at different pH (pH 4, 7, 12) of 5 and 6. 20 mg of CDs in 300  $\mu\text{L}$  solution.

S6. Fluorescence titration of 5/cF complex

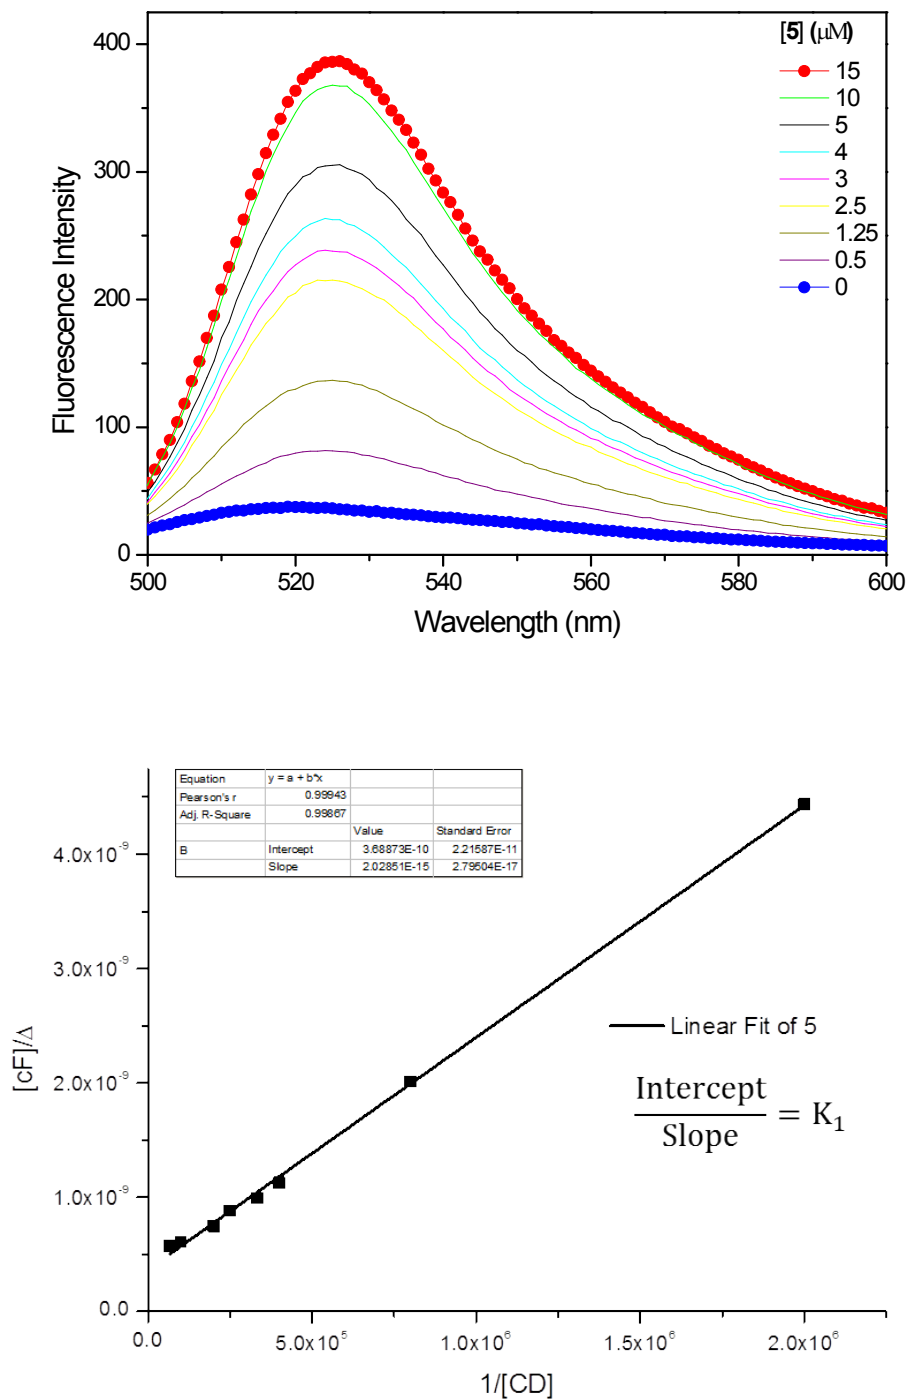

Figure S6. Fluorescence titration of cF (0.2 μM) with compound 5.  $1/[\Delta]$  vs.  $1/[cF]$  plotting at 524 nm. Inset: binding constant calculation. The fluorescence was excited at 490 nm (excitation/emission slit: 3/3).

## S7. Molecular Modeling of cF

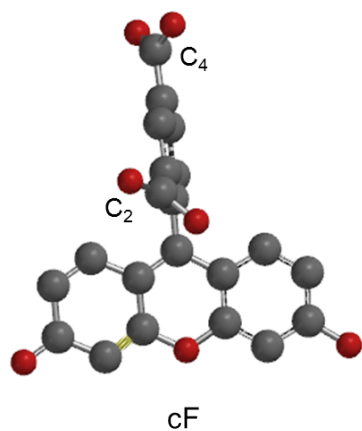

Figure S7. Molecular modeling (Equilibrium geometry at ground state with B3LYP/6-31G\* basis set in vacuum, Spartan '08 v1.2.0) of cF (acidic form). The carboxylic C<sub>2</sub> and phenolic O distance = 7.54 Å and the carboxylic C<sub>4</sub> and phenolic O distance = 10.12 Å. The molecules are displayed using a ball and spoke model at the same scale.

## References

1. F. Guillo, B. Hamelin, L. Jullien, J. Canceill, J.- M. Lehn, L. De Robertis, H. Driguez, *Bull. Soc. Chim. Fr.*, 1995, **132**, 857–866.
2. P. R. Ashton, R. Königer and J. F. Stoddart, *J. Org. Chem.*, 1996, **61**, 903–908.
3. N. Mourtzis, K. Eliadou, C. Aggelidou, V. Sophianopoulou, I. M. Mavridis, K. Yannakopoulou, *Org. Biomol. Chem.*, 2007, **5**, 125–231.
